# Supplementary material
Source: publisher figshare collection journal article supplement (https://acs.figshare.com/ndownloader/files/4080832)
Supplement: Supplementary file 1 [file 4080832]

## Supporting Information

Size-dependent tumor penetration and *in vivo* efficacy of monodisperse drug-silica nanoconjugates

Li Tang,<sup>†</sup> Nathan P. Gabrielson,<sup>†</sup> Timothy M. Fan,<sup>‡</sup> and Jianjun Cheng<sup>\*,†</sup>

<sup>†</sup>Department of Materials Science and Engineering, and <sup>‡</sup>Department of Veterinary Clinical Medicine, University of Illinois at Urbana-Champaign, 1304 W. Green Street, Urbana, IL, 61801 (USA)

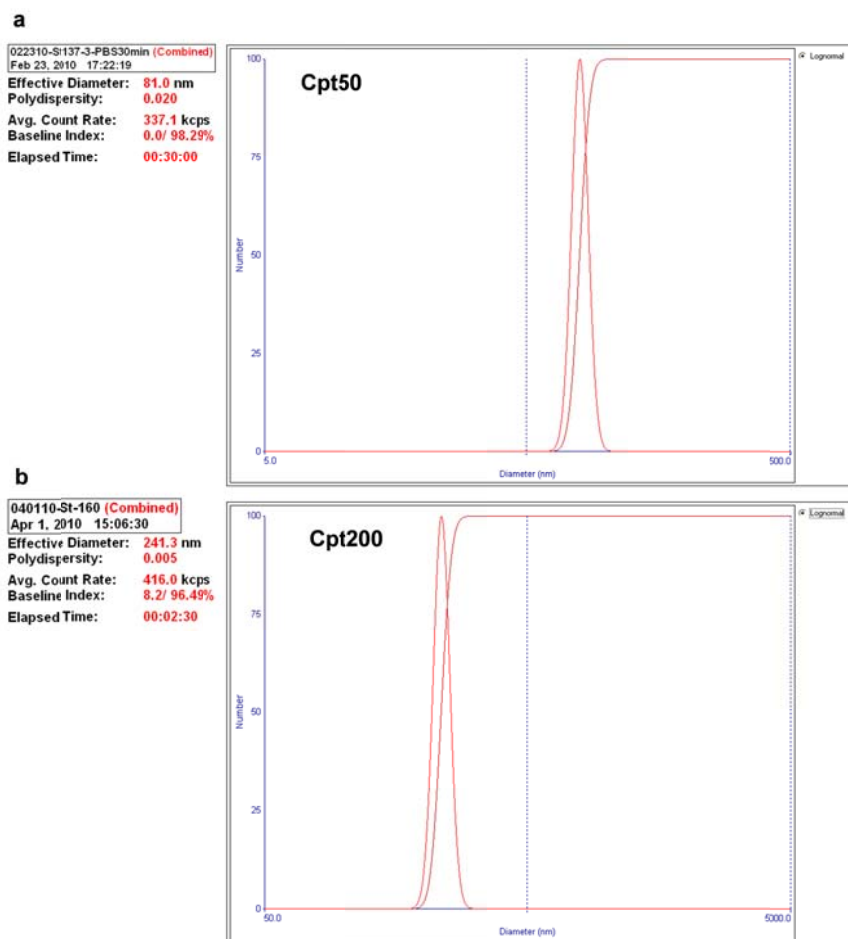

**Figure S1.** Dynamic light scattering (DLS) measurement of Cpt-NCs: **a**, Cpt50, **b**, Cpt200. The hydrodynamic sizes and distribution and polydispersity (PDI) were shown in the raw DLS data.
